# Supplementary material for: Determinants and Sources of Iron Intakes of Australian Toddlers: Findings from the SMILE Cohort Study
Source: PubMed Central journal article supplement (PMC6352266; doi:10.3390/ijerph16020181), 2019-01-09
Supplement: ijerph-16-00181-s001.pdf [file ijerph-16-00181-s001.pdf]

**Supplementary Table 1.** Sensitivity analysis: Factors associated with usual iron intakes (mean values and 95% confidence interval) of toddlers with plausible energy intakes (n=703)

| Variables                                    | % below EAR | Unadjusted Mean (mg/d) | 95% CI  | <i>p</i> | Adjusted Mean (mg/d) | 95% CI | <i>p</i> |
|----------------------------------------------|-------------|------------------------|---------|----------|----------------------|--------|----------|
| Total sample                                 | 20.6        | 6.7                    | 6.5-6.9 |          |                      |        |          |
| Maternal characteristics                     |             |                        |         |          |                      |        |          |
| Maternal age at recruitment (yrs)            |             |                        |         | 0.819    |                      |        |          |
| <25                                          | 19.4        | 6.5                    | 5.7-7.3 |          |                      |        |          |
| 25-34                                        | 20.3        | 6.7                    | 6.5-7.0 |          |                      |        |          |
| ≥35                                          | 21.7        | 6.6                    | 6.2-7.1 |          |                      |        |          |
| Maternal education - highest level completed |             |                        |         | 0.196    |                      |        |          |
| High school/vocational                       | 18.3        | 6.8                    | 6.5-7.2 |          |                      |        |          |
| Some university and above                    | 22.4        | 6.6                    | 6.3-6.9 |          |                      |        |          |
| IRSAD score                                  |             |                        |         | 0.831    |                      |        |          |
| Deciles 1-2                                  | 21.6        | 6.6                    | 6.0-7.2 |          |                      |        |          |
| Deciles 3-4                                  | 21.2        | 6.5                    | 6.0-7.0 |          |                      |        |          |
| Deciles 5-6                                  | 20.7        | 6.7                    | 6.2-7.2 |          |                      |        |          |
| Deciles 7-8                                  | 22.8        | 6.9                    | 6.4-7.4 |          |                      |        |          |
| Deciles 9-10                                 | 17.2        | 6.6                    | 6.2-7.1 |          |                      |        |          |

**Table 3 Cont.**

| Variables                         | % below EAR | Unadjusted Mean (mg/d) | 95% CI  | <i>p</i> | Adjusted Mean (mg/d) | 95% CI  | <i>p</i> |
|-----------------------------------|-------------|------------------------|---------|----------|----------------------|---------|----------|
| Maternal country of birth         |             |                        |         | 0.005    |                      |         | 0.070    |
| Australia and New Zealand         | 20.0        | 6.5                    | 6.3-6.8 |          | 6.4                  | 6.2-6.7 |          |
| India                             | 23.3        | 6.5                    | 5.6-7.4 |          | 6.6                  | 5.8-7.2 |          |
| China                             | 8.6         | 7.7                    | 6.7-8.7 |          | 6.4                  | 5.5-7.2 |          |
| UK                                | 20.8        | 6.2                    | 4.9-7.4 |          | 6.1                  | 5.2-7.1 |          |
| Asia Other                        | 27.7        | 8.2                    | 7.4-9.1 |          | 7.5                  | 6.8-8.2 |          |
| Other                             | 23.7        | 6.5                    | 5.6-7.5 |          | 6.9                  | 6.1-7.7 |          |
| Maternal BMI (kg/m <sup>2</sup> ) |             |                        |         | 0.935    |                      |         |          |
| <25                               | 21.3        | 6.6                    | 6.3-6.9 |          |                      |         |          |
| 25-29.99                          | 22.1        | 6.7                    | 6.2-7.2 |          |                      |         |          |
| ≥30                               | 17.5        | 6.7                    | 6.1-7.3 |          |                      |         |          |
| Parity                            |             |                        |         | <0.001   |                      |         | 0.009    |
| Primiparous                       | 16.6        | 7.2                    | 6.9-7.5 |          | 6.9                  | 6.5-7.2 |          |
| Multiparous                       | 23.8        | 6.2                    | 5.9-6.6 |          | 6.4                  | 6.0-6.8 |          |

**Table 3 Cont.**

| Variables                                | % below<br>EAR | Unadjusted<br>Mean (mg/d) | 95% CI  | <i>p</i> | Adjusted<br>Mean (mg/d) | 95% CI  | <i>p</i> |
|------------------------------------------|----------------|---------------------------|---------|----------|-------------------------|---------|----------|
| Child characteristics                    |                |                           |         |          |                         |         |          |
| Sex                                      |                |                           |         | 0.369    |                         |         |          |
| Male                                     | 19.8           | 6.7                       | 6.5-7.1 |          |                         |         |          |
| Female                                   | 21.7           | 6.6                       | 6.2-6.9 |          |                         |         |          |
| Primary milk feeding method at 12 months |                |                           |         | <0.001   |                         |         | <0.001   |
| Breastmilk                               | 45.6           | 4.5                       | 4.2-4.8 |          | 4.6                     | 4.2-5.0 |          |
| Mixed - breastmilk and formula           | 14.3           | 7.4                       | 6.7-8.0 |          | 7.4                     | 6.7-8.0 |          |
| Formula                                  | 2.2            | 8.9                       | 8.6-9.2 |          | 9.0                     | 8.6-9.4 |          |
| Neither breastmilk nor formula           | 23.7           | 5.4                       | 5.0-5.7 |          | 5.2                     | 5.2-6.1 |          |

IRSAD, Index of Relative Socio-Economic Advantage and Disadvantage, where decile 1 = most disadvantaged and decile 10 = most advantaged. EAR Estimated average requirement
